**Host associated core microbiome**

1                   **COREMIC: a web-tool to search for a root-zone associated CORE MICrobiome**

2   Richard R. Rodrigues<sup>a,b</sup>, Nyle C. Rodgers<sup>c</sup>, Xiaowei Wu<sup>d</sup>, and Mark A. Williams<sup>a,e,\*</sup>

3   <sup>a</sup>Interdisciplinary Ph.D. Program in Genetics, Bioinformatics, and Computational Biology, Virginia Tech, Blacksburg 24061, Virginia,  
4   United States of America.

5   <sup>b</sup>Department of Pharmaceutical Sciences, Oregon State University, Corvallis 97331, Oregon, United States of America.

6   <sup>c</sup>Department of Electrical and Computer Engineering, Virginia Tech, Blacksburg 24061, Virginia, United States of America.

7   <sup>d</sup>Department of Statistics, Virginia Tech, Blacksburg 24061, Virginia, United States of America.

8   <sup>e</sup>Department of Horticulture, Virginia Tech, Blacksburg 24061, Virginia, United States of America.

9

10   Richard Rodrigues ([richrr@vt.edu](mailto:richrr@vt.edu))

11   Nyle Rodgers ([nyle@vt.edu](mailto:nyle@vt.edu))

12   Xiaowei Wu ([xwwu@vt.edu](mailto:xwwu@vt.edu))

13

14   **Contact:** Mark Williams ([markwill@vt.edu](mailto:markwill@vt.edu)); 301 Latham Hall, 220 Ag Quad Ln., Blacksburg, VA 24061

15   \*To whom correspondence should be addressed.

16

17   **Abstract**

18   Microbial diversity on earth is extraordinary, and soils alone harbor thousands of species per gram of soil. Understanding  
19   how this diversity is sorted and selected into habitat niches is a major focus of ecology and biotechnology, but remains  
20   only vaguely understood. A core microbiome approach was used to mine information from databases to show how it can  
21   be used to answer questions related to habitat-microbe relationships. By making use of the frenetic and burgeoning  
22   growth of information from databases, our tool “COREMIC” meets a great need in the search for understanding niche  
23   partitioning and habitat-function relationships. The work is unique, furthermore, because it provides a user-friendly statis-  
24   tically robust web-tool (<http://coremic2.appspot.com>), developed using Google App Engine, to help in the process of da-  
25   tabase mining to identify the “core microbiome” associated with a given habitat. A case study is presented using data  
26   from 31 switchgrass rhizosphere community habitats across a diverse set of soil and sampling environments. The meth-  
27   odology utilizes an outgroup of 28 non-switchgrass (other grasses and forbs) to identify a core switchgrass microbiome.  
28   Even across a diverse set of soils (5 environments), and conservative statistical criteria (presence in more than 90% sam-  
29   ples and FDR  $q$ -val < 0.05% for Fisher’s exact test) a core set of bacteria associated with switchgrass was observed.

**R. Rodrigues et al.**

---

30 These included, among others, closely related taxa from *Lysobacter spp.*, *Mesorhizobium spp.*, and *Chitinophagaceae*.  
31 These bacteria have been shown to have functions related to the production of bacterial and fungal antibiotics and plant  
32 growth promotion. COREMIC can be used as a hypothesis generating or confirmatory tool that shows great potential for  
33 identifying taxa that may be important to the functioning of a habitat (e.g. host plant). The case study, in conclusion,  
34 shows that COREMIC can identify key habitat-specific microbes across diverse samples, using currently available data-  
35 bases and a unique freely available software.

36

37 **Keywords:** microbiome; root-zone; rhizosphere; web-tool; software; app; meta-analysis; database; data mining

38

## 39 **1. Introduction**

40 Microbial diversity on earth is extraordinary, and soils alone harbor thousands of species per gram. Understanding how  
41 this diversity is sorted and selected into habitat niches is a major focus of ecology and biotechnology, but remains only  
42 vaguely understood. The advent of next-generation sequencing technologies now allow for the potential to make great  
43 leaps in the study of microbe-habitat relationships of highly diverse microbial communities and environments. The iden-  
44 tity and functions of this overwhelming multitude of microbes are in the beginning stages of being described, and are  
45 already providing insights into microbial impacts on plant and animal health (Berg, 2009; Evans and Schwarz, 2011;  
46 Clemente et al., 2012). Making use of the overwhelming amount of information on microbial taxa and habitats has enor-  
47 mous potential for use to further understand microbial-habitat relationships. Thus, the advent of new methods and ap-  
48 proaches to utilize this data and describe microbiomes will benefit microbial ecology and biotechnology.

49 Though variations exist, a core microbiome can be defined, conceptually, using Venn diagrams, where over-lapping  
50 circles and non-overlapping areas of circles represent shared and non-shared members of a habitat, respectively (Shade  
51 and Handelsman, 2012). Typically, microbiomes identified in this manner are not statistically evaluated, or by nature,  
52 seek to answer specific hypothesis that are specific to an experiment. For example, studies often identify microbes asso-  
53 ciated with different plant growth stages, species, cultivars, and locations but rarely, if at all, mine databases or perform  
54 meta-analysis to statistically identify microbiomes across studies and experimental conditions (Chaudhary et al., 2012;  
55 Liang et al., 2012; Mao et al., 2013; Mao et al., 2014; Hargreaves et al., 2015; Rodrigues et al., 2015; Jesus et al., 2016;  
56 Rodrigues et al., 2016). Describing differences due to treatment or habitat conditions are informative in their own right,  
57 however, extending this framework to include an easy to use, and statistically robust tool to help in the mining of data  
58 from underutilized and burgeoning databases (e.g. the National Center for Biotechnology Information (NCBI), Riboso-

### **Host associated core microbiome**

59 mal Database Project) can help transform the ecological study of microbes in their natural environment. Using the vast  
60 and growing databases of organism and habitat metadata will allow for both the testing and development of hypotheses  
61 associated with habitat-microbe relationships that were not formerly possible.

62 To address the challenges described above, we developed COREMIC - a novel, easy to use, and freely available web  
63 tool to identify the “core microbiome”, of any well-defined habitat (e.g. plant root-zone) or niche (Shade and  
64 Handelsman, 2012). This straightforward approach is a novel and powerful way to complement existing analysis (e.g.  
65 indicator species analysis (ISA) (Dufrene and Legendre, 1997)) by allowing for the use of data that is now overflowing  
66 among freely available databases. It seeks to determine the core set of microbes (core microbiome) that are explicitly  
67 associated with a host system or habitat. The ability to identify core microbiomes at this scale has great potential to de-  
68 scribe host-microbe interactions and habitat preferences of microbes.

69 A meta-analysis based case study was performed, combining diverse sequencing datasets derived from NCBI, to test  
70 for the occurrence of a core microbiome in the rhizosphere (root-zone) of switchgrass. Switchgrass is a US-native, peren-  
71 nial grass studied by many researchers, and thus has a growing database to mine for genetic information. Its widespread  
72 study is likely a result of its bioenergy potential, and the capacity of the grass to grow on marginal lands not dedicated to  
73 crops. Studies have identified different bacteria found in the root-zones of switchgrass (Jesus et al., 2010; Mao et al.,  
74 2011; Chaudhary et al., 2012; Liang et al., 2012; Mao et al., 2013; Bahulikar et al., 2014; Mao et al., 2014; Werling et al.,  
75 2014; Hargreaves et al., 2015; Jesus et al., 2016; Rodrigues et al., 2016), however, there has been no integrative study of  
76 different datasets identifying the core microbiome in switchgrass rhizospheres. It is thus proposed to identify host-habitat  
77 relationships as a proof of concept for a core microbiome. In this paper we utilize a plant host to define a habitat, but the-  
78 oretically any habitat and associated organisms could make use of COREMIC and its approach to identify a core micro-  
79 biome.

80

## **81 2. Material and methods**

### *82 2.1. Datasets used in the study*

83 A diverse set of data composed of 61 samples from two different published datasets and collected from multiple locations  
84 (Jesus et al., 2016; Rodrigues et al., 2016) were used for this study. Data were obtained from the NCBI and selected  
85 based on the availability of the raw (16S rRNA) sequence data of root-zone bacteria from switchgrass and that for an out-  
86 group of reference (native and/or other grasses) plants.

**R. Rodrigues et al.**

---

87 The dataset “Jesus 2016”(Jesus et al., 2016), PRJEB6704, compared the rhizosphere soil microbial communities asso-  
88 ciated with restored prairie with three grass crops, namely corn, switchgrass, and mixed prairie grasses. The grasses were  
89 grown in fields of Michigan and Wisconsin and were harvested after two and ten years. The V6-V8 region of the 16S  
90 rRNA gene was amplified and sequenced using the Roche 454 pyrosequencing. In our study, we used a total of 43 sam-  
91 ples (3 each from corn, switchgrass, mixed grasses (2 yrs. only), and restored prairie grasses grown in Wisconsin and  
92 Michigan, and sampled after 2 and 10 years. Switchgrass grown in Michigan, composed of 4 samples, were collected  
93 following 10 years of plant growth.

94 The dataset “Rodrigues 2016”(Rodrigues et al., 2016), PRJNA320123, compared the root-zone soil microbial commu-  
95 nities associated with switchgrass cultivars: “Alamo” and “Dacotah”. The switchgrass were grown in the greenhouse us-  
96 ing soil derived from plots growing Switchgrass (>7 years) near Blacksburg, VA. Switchgrass rhizosphere bacteria were  
97 sampled at three different growth stages. The V3-V4 region of the 16S rRNA gene was amplified and sequenced using  
98 Illumina MiSeq sequencing. In our study, we used a total of 18 switchgrass samples for Alamo (A) and Dacotah (D) from  
99 stages V2 and E3 (4 AV2, 4 DV2, 5 AE3, 5 DE3 = 18).

100 Overall, these datasets served as a diverse resource (relevant differences are summarized in Figure 1) to compare the  
101 root-zone bacteria and identify core-bacteria associated with switchgrass.

102

### 103 *2.2. Sequence data analysis and picking of Operational Taxonomic Units (OTU)*

104 For the Rodrigues 2016 dataset, the OTU table was obtained from previously performed analysis (Rodrigues et al., 2016).  
105 For the Jesus 2016 dataset, quality score (25) and read lengths (150) thresholds were enforced using cutadapt (1.8.1)  
106 (Martin, 2011) and an open reference OTU picking (enable\_rev\_strand\_match True) was performed in QIIME v1.8.0  
107 (Caporaso et al., 2010), as previously described (Rodrigues et al., 2015; Rodrigues et al., 2016), to allow comparison with  
108 the other dataset. Briefly, uclust (Edgar, 2010) was used to cluster reads into OTUs (97% sequence similarity) and assign  
109 taxonomy against the Greengenes reference database version 13.8 (DeSantis et al., 2006; McDonald et al., 2012). Two  
110 samples from the Jesus 2016 dataset were removed from downstream analysis due to very few sequences assigned to  
111 OTUs.

112

### 113 *2.3. Combining two datasets*

114 Within each OTU table, sequences assigned to identical OTUs in a sample were summed to retain unique taxa. The  
115 common (678) OTUs from the two datasets were selected, converted to biom format and used for further analyses (Figure

### **Host associated core microbiome**

116 1). The data table was filtered and rarefied using a sequence threshold of 1150, and the beta diversity was calculated using  
117 Bray-Curtis (Beals, 1984) distance and visualized using Principal Coordinate Analysis (Gower, 2005). Multivariate  
118 data analysis methods of MRPP (Mielke, 1984), Permanova (Anderson, 2001) and ANOSIM (Clarke, 1993) were used to  
119 identify whether the plant type (switchgrass versus non-switchgrass) were associated with different bacterial communi-  
120 ties.

121

#### **2.4. Core microbiome analysis**

123 To find the set of core OTUs, the samples in the combined OTU table (original data) were first divided into the interest  
124 group samples (switchgrass) and out-group samples. The abundance values for each OTU in each sample are then con-  
125 verted to binary (present/absent) values based on whether they are zero or nonzero. For each OTU a one-tailed Fisher's  
126 Exact Test was used to calculate a  $p$ -value testing whether an OTU was present in a significantly higher portion in the  
127 interest in-group (Switchgrass) compared to the out-group samples (numerous other grass species).

128 These  $p$ -values were corrected for multiple-testing using Benjamini Hochberg. The OTUs with a  $q$ -value  $< 0.05$  were  
129 then selected to only the OTUs that are present in at least 90% of the interest group samples. Uninformative OTUs (e.g.,  
130 k\_Bacteria;p\_c;o\_f;g\_s\_) were filtered out and the remaining OTUs were candidates for the core microbiome.

131

#### **2.5. Implementation of COREMIC**

133 The web-tool was developed in Python 2.7, and is hosted on Google App Engine. Other requirements include GoogleAp-  
134 pEnginePipeline 1.9.22.1, pyqi 0.3.1, requests 2.10.0, requests-toolbelt 0.6.2, mailjet-rest 1.2.2, biom-format 1.1.2, ete3  
135 3.0.0 (for tree generation—see below for details), webapp2 2.5.2, numpy 1.6.1, matplotlib 1.2.0, Jinja2 2.6, ssl 2.7.

136 COREMIC is accessible via any internet connected browser and emails the results to the user. The processing times with  
137 the default settings after uploading the data are provided in Table S1.

138 A custom python script generates a phylogenetic tree using the taxonomic labels for each OTU displaying the relation-  
139 ship between the core OTUs obtained from the group of interest and the out-group. This tree is generated using the ete3  
140 3.0.0 library.

### **3. Results**

142 After quality filtering, a total of 319,821 reads were obtained from the Jesus 2016 dataset (mean 461.45 and std. dev.  
143 69.34). Two samples with very few (48 and 75) counts were removed; each of the remaining samples had more than 1150

*R. Rodrigues et al.*

144 sequences assigned to OTUs. The number of OTUs in the Jesus 2016 and Rodrigues 2016 datasets was 771 and 1118,  
145 respectively. The combined dataset had 678 OTUs, 31 switchgrass and 28 non-switchgrass (other grasses) samples.

146 The bacterial communities in switchgrass and grasses from the combined dataset were significantly different (Per-  
147 manova, MRPP, and ANOSIM  $p$ -values  $< 0.01$ ) and as can be observed using the PCoA plot using the Bray-Curtis dis-  
148 similarity metric (Figure 2). These differences were apparent despite significant difference across datasets (Permanova,  
149 MRPP, and ANOSIM  $p$ -values  $< 0.01$ ); which could be the result, for example, of the heterogeneity of the data set related  
150 to climate, soil type-condition, growth conditions, and plant age. In this regard, at the phylum level, Mann Whitney test  
151 identified Bacteroidetes and Verrucomicrobia had significantly greater ( $p$ -value  $< 0.05$ ) relative abundance in  
152 switchgrass, whereas, Gemmatimonadetes were more abundant in other grasses (Figure S1).

153 We used a very conservative criterion of  $>90\%$  threshold i.e., an OTU has to be present in at least 90% of switchgrass  
154 samples and observed five OTUs with FDR  $q$ -values  $< 0.05$  (Table 1). The relative abundance and a phylogenetic tree  
155 exhibiting their relationship with the core-OTUs from the non-switchgrass samples is shown in Figure S2 and Figure S3,  
156 respectively. Despite the enormous variability across the many different sampling locations, there is support for the oc-  
157 currence of a core microbiome in the root-zone of switchgrass.

158

159 **Table 1: Bacterial OTUs associated with switchgrass.**

| OTU                                                                                          | present(%) |
|----------------------------------------------------------------------------------------------|------------|
| p_Proteobacteria;c_Gammaproteobacteria;o_Xanthomonadales;f_Xanthomonadaceae;g_Lysobacter;s_  | 100        |
| p_Planctomycetes;c_Planctomycetia;o_B97;f_;g_;s_                                             | 96.8       |
| p_Bacteroidetes;c_[Saprospirae];o_[Saprospirales];f_Chitinophagaceae                         | 96.8       |
| p_Proteobacteria;c_Alphaproteobacteria;o_Rhizobiales;f_Phyllobacteriaceae;g_Mesorhizobium;s_ | 90.3       |
| p_Proteobacteria;c_Gammaproteobacteria;o_Legionellales;f_;g_;s_                              | 90.3       |

160 The core bacterial OTUs those were significantly ( $q$ -value  $< 0.05$ ) associated with switchgrass, calculated using pres-  
161 ence/absence data and present in  $>90\%$  switchgrass samples.

162

## Host associated core microbiome

### 163 4. Discussion

164 The case study showed how COREMIC can identify key habitat-specific microbes across diverse samples, using current-  
165 ly available databases and a unique freely available software. The core set of bacteria associated with switchgrass includ-  
166 ed, among others, closely related taxa from *Lysobacter spp.*, *Mesorhizobium spp.*, and *Chitinophagaceae*. The functional  
167 relevance of these bacteria related to switchgrass is unknown, but it is notable that these bacteria have been shown to  
168 produce bacterial and fungal antibiotics and promote the growth of plants (Kaneko et al., 2000; Kilic-Ekici and Yuen,  
169 2004; Weir et al., 2004; Islam et al., 2005; Jochum et al., 2006; Ji et al., 2008; Park et al., 2008; Nandasena et al., 2009;  
170 Yin, 2010; Bailey et al., 2013; Degefu et al., 2013; Guerrouj et al., 2013; Madhaiyan et al., 2015). The analyses from the  
171 highly diverse data sets thus provided information that helps to greatly narrow down possibilities and thus set the stage  
172 for testing, using controlled studies, how the core microbiota potentially support or antagonize the function of a native  
173 grass. This novel toolkit is simple to use and supports use by a broad range of biological scientists, and is particularly  
174 relevant to those with expertise in their field but with limited bioinformatics background. Overall, in a dataset derived  
175 from a complex and diverse set of habitats and ecosystems, this tool was shown to pinpoint microbiota of the microbiome  
176 that might have important functional implications within their habitat or host.

177

#### 178 4.1. Methodological considerations in the use of COREMIC

179 COREMIC performs a complementary analysis different from that of existing methods by using presence/absence data.  
180 For two groups (A and B) it checks whether (pre-determined percentage of) samples from group A have a non-zero value  
181 for the OTU. This allows scientists to operate without making assumptions about the PCR-based OTU relative abundanc-  
182 es. This is considered a potential advantage of the method because it is unknown whether relative abundance of sequence  
183 data is representative of true relative differences between communities. Further research, in this regard, will be aimed  
184 towards investigating other measures of OTU “presence”, namely the extent of exclusivity, consistency, or abundance of  
185 the group that is eventually determined to be a core microbiome.

186 Sampling plots used in this study were located across a range of diverse environments to help create a backdrop of het-  
187 erogeneity. While this diversity of habitat conditions ignores the potential for microbe-environment interactions that  
188 might be important for the plant-microbial relationship, it has the advantage of being a conservative approach with high  
189 veracity for defining a core microbiome regardless of habitat heterogeneity. The locations from which samples were  
190 grown (Michigan, Wisconsin, Virginia) were treated as independent to help isolate the overall habitat effect of

**R. Rodrigues et al.**

---

191 switchgrass (Werling et al., 2014; Jesus et al., 2016). When the effects of habitat are thought to be habitat specific, re-  
192 searchers can take this into account during the design and analysis using COREMIC.

193 It is notable that the representation of an outgroup (multiple non-switchgrass species) is an important criteria and  
194 choice made by researchers, and is an approach that has both advantages and caveats. By definition, a habitat is defined  
195 by its differences from that of other habitats, and therefore the use of the outgroup is an important choice. A counter-  
196 argument for the current dataset might argue for exclusion of breeding lines of a cultivated grass (maize) as being unre-  
197 presentative of the grass outgroup. In our case, it was thought, *a priori*, that a diverse set of grasses would provide the best  
198 comparison; and no compelling argument was found that supported the exclusion of maize from the analysis. An implicit  
199 assumption was also made that the taxonomy of plant species (root-zone habitats) play an important role in determining  
200 root-zone microbial communities, an approach supported by extensive findings that different grass species associate with  
201 different microbial communities (Kuske et al., 2002; Kennedy et al., 2004; Berendsen et al., 2012; Chaudhary et al.,  
202 2012; Turner et al., 2013). So although there is a need for careful consideration of the experimental questions of interest  
203 when using COREMIC, this is a common, if not ubiquitous foundation of all experimentation and hypothesis testing. The  
204 results provide a statistically valid approach using freely available software to describe and define a core microbiome of  
205 switchgrass.

206 The choice of the outgroup, furthermore, for determining a core microbiome is amenable to choice using deductive rea-  
207 soning but ultimately limited by available data. This issue almost certainly limits inclusion of many functionally im-  
208 portant rhizosphere microbes that could affect the growth of switchgrass. In this study, the proof of concept utilized a  
209 conservative approach to highlight the methodology across a diversity of geographies, soil types, and plant ages. The  
210 COREMIC tool as well as the multiple methods for defining a core microbiome (e.g., QIIME (Caporaso et al., 2010),  
211 ISA (Dufrene and Legendre, 1997)) will always be defined by the expertise, and the nature of the hypotheses defined and  
212 defended by individual researchers.

213

#### 214 *4.2. Core Microbes*

215 The individual datasets described in this study had previously focused on identifying abundant microbes and differences  
216 due to experimental conditions. The current meta-analysis goes a step further to find common microbiota that are associ-  
217 ated with switchgrass across the diverse experimental conditions. The members of the *Lysobacter* genus, an identified  
218 core microbe of switchgrass, are known to live in soil and have been shown to be ecologically important due to their abil-  
219 ity to produce exo-enzymes and antibiotics (Reichenbach, 2006). Their antimicrobial activity against bacteria, fungi, uni-



### **Host associated core microbiome**

220 cellular algae, and nematodes have been described (Islam et al., 2005; Jochum et al., 2006; Park et al., 2008; Yin, 2010).  
221 Strains of this genus, for example, have been used for control of diseases caused by bacteria in rice (Ji et al., 2008) and  
222 tall fescue (Kilic-Ekici and Yuen, 2004). Reports of their function thus support the idea that they may play an important  
223 role in switchgrass growth and survival. The core microbiome results thus support further research into the role played by  
224 this bacterium in the switchgrass rhizosphere.

225 Similarly, members of the *Mesorhizobium* genus are well-known diazotrophs (Kaneko et al., 2000) and previously  
226 shown to be symbiotically associated with switchgrass (DeAngelis et al., 2010; Bahulikar et al., 2014) and legumes (Weir  
227 et al., 2004; Nandasena et al., 2009; Degefu et al., 2013; Guerrouj et al., 2013). Another identified core microbiome taxa,  
228 soil-dwelling members of the *Chitinophagaceae* family are known to have  $\beta$ -glucosidase (Bailey et al., 2013) and Ami-  
229 nocyclopropane-1-carboxylate (ACC) deaminase activities and ability to produce indole-3-acetic acid (IAA) (Madhaiyan  
230 et al., 2015). These molecules and enzymes are well known for their effects on plant growth (Zhao, 2010; Van de Poel  
231 and Van Der Straeten, 2014). The capacity to degrade cellulose might provide additional and readily available options to  
232 aid survival of these bacteria near switchgrass root zones during times of environmental stress. ACC deaminase and IAA  
233 production, in contrast, are potent plant growth modulators (Glick, 2014) that could play a role in plant productivity and  
234 survival, especially under conditions of plant physiological stress. Though these examples above would need further  
235 study, they provide consistent examples describing how a core microorganism could play a role in determining plant  
236 function and growth. The power of the approach stems from the ability to identify the core microbes associated with a  
237 plant (or other habitat), and that can, with veracity, narrow down potentially important core microbes from otherwise  
238 hyperdiverse samples.

239 From a technological standpoint, it is important to put the current approach into context with research before the meta-  
240 genomics era. The search and identification of antagonistic plant growth promoting microbes has previously been tedious  
241 and labor intensive. Screenings of hundreds of microbes were used to cultivate and identify candidate microbes that  
242 might support (or deter) plant growth. In the case of beneficial microbes, even when identified under greenhouse condi-  
243 tions, the beneficial effects rarely translated into plant supportive growth under field growth conditions (Babalola, 2010;  
244 Hayat et al., 2010). With the aid of hindsight and new knowledge suggesting the importance of the soil habitat and root-  
245 soil interactions in the development of growth promoting plant-microbial relationships, the approach used in this study  
246 reverses the focus (from top-down to bottom-up) to search for microbes that appear to already be naturally well-adapted  
247 to the root-soil habitats of interest (Trabelsi and Mhamdi, 2013; Souza et al., 2015). This process streamlines the search  
248 for suitable microbes from a daunting pool of thousands of bacterial taxa. Bacteria and fungi with well-known partner-

*R. Rodrigues et al.*

---

249 ships with members of the core microbiome, it would be expected, to be more readily adaptable to their native environ-  
250 ment. Indeed, the concept of adaptability to an environment has been shown to be true for many types of microbes across  
251 the environmental spectrum, and has given rise to the concept of the niche (Lennon et al., 2012). The COREMIC tool  
252 provides an alternative and logical approach to help mine available datasets, in the search for core microbiomes associat-  
253 ed with habitats that are ecologically and agriculturally important.

254

#### 255 *4.3. Conclusions*

256 The COREMIC tool, by helping to mine multiple datasets fills a major gap in the search for the core microbiome associ-  
257 ated with a host or habitat. It allows for the development of a working hypothesis in the search for microbes well suited  
258 for a habitat or host-microbe interaction. It can also be used to confirm laboratory studies that have identified target mi-  
259 crobes that might be important symbionts or thought to be associated with a specific habitat. In the case of plants, but not  
260 limited to them, the COREMIC approach can identify microbial targets that might be useful for plant growth promotion.  
261 An example of this would be the identification of diazotrophic bacteria that aid the growth of bioenergy grasses and help  
262 to serve the development of sustainable agricultural systems. This combined with the ongoing efforts of plant breeding  
263 and genetic modification would help to catalyze microbe-driven crop yield improvement while practicing environmental  
264 stewardship through reduced fertilizer use. Here we show the applicability of COREMIC in rhizosphere-associated mi-  
265 crobes, but the overall concepts are translational across disciplines with interests in host-microbe and microbe-habitat  
266 relationships. The applicability of COREMIC for the identification of core genes and microbes has excellent potential to  
267 help understand the roles of microorganisms in complex and diverse microbial communities.

268

#### 269 **Declarations**

#### 270 **Ethics approval and consent to participate**

271 Not applicable.

272

#### 273 **Consent for publication**

274 Not applicable.

275

#### 276 **Availability of data and materials**

### **Host associated core microbiome**

277 The datasets and results supporting the conclusions of this article are included within the article and supplementary files.  
278 COREMIC and the datasets are available at <http://coremic2.appspot.com>. An archived version of its code is available on  
279 github (<https://github.com/richrr/coremicro>) at <http://tinivurl.com/coremic> COREMIC and its code is freely available  
280 under the GPL license.

281

### **Competing interests**

283 The authors declare that they have no competing interests.

284

### **Authors' contributions**

286 Conceived and designed the experiments: RRR MAW. Implemented software tools: RRR NCR. Performed the experi-  
287 ments: RRR NCR. Analyzed the data: RRR NCR XW MAW. Wrote the paper: RRR NCR XW MAW. All authors read  
288 and approved the final manuscript.

289

### **Acknowledgements**

291 The authors thank Dr. Roderick Jensen and James Wrenn for their suggestions in improving the manuscript. We thank  
292 Dr. James McClure for his help in the web-tool development. We also acknowledge BIOM, Google App Engine and their  
293 developers. The authors acknowledge Virginia Polytechnic Institute and State University's Open Access Subvention  
294 Fund. We thank Virginia Tech's Genetics, Bioinformatics, and Computational Biology, Department of Horticulture for  
295 providing personnel funding. Research was also partially funded by grants from USDA-NIFA (2011-03815).

296

### **References**

- 298 Anderson, M.J., 2001. A new method for non-parametric multivariate analysis of variance. *Austral Ecology* 26, 32-46.
- 299 Babalola, O.O., 2010. Beneficial bacteria of agricultural importance. *Biotechnol Lett* 32, 1559-1570.
- 300 Bahulikar, R.A., Torres-Jerez, I., Worley, E., Craven, K., Udvardi, M.K., 2014. Diversity of nitrogen-fixing bacteria  
301 associated with switchgrass in the native tallgrass prairie of northern Oklahoma. *Appl Environ Microbiol* 80, 5636-5643.
- 302 Bailey, V.L., Fansler, S.J., Stegen, J.C., McCue, L.A., 2013. Linking microbial community structure to beta-glucosidic  
303 function in soil aggregates. *ISME J* 7, 2044-2053.
- 304 Beals, E.W., 1984. Bray-Curtis Ordination: An Effective Strategy for Analysis of Multivariate Ecological Data. 14, 1-55.

**R. Rodrigues et al.**

---

- 305 Berendsen, R.L., Pieterse, C.M., Bakker, P.A., 2012. The rhizosphere microbiome and plant health. *Trends Plant Sci* 17,  
306 478-486.
- 307 Berg, G., 2009. Plant-microbe interactions promoting plant growth and health: perspectives for controlled use of  
308 microorganisms in agriculture. *Appl Microbiol Biotechnol* 84, 11-18.
- 309 Caporaso, J.G., Kuczynski, J., Stombaugh, J., Bittinger, K., Bushman, F.D., Costello, E.K., Fierer, N., Pena, A.G.,  
310 Goodrich, J.K., Gordon, J.I., Huttley, G.A., Kelley, S.T., Knights, D., Koenig, J.E., Ley, R.E., Lozupone, C.A.,  
311 McDonald, D., Muegge, B.D., Pirrung, M., Reeder, J., Sevinsky, J.R., Turnbaugh, P.J., Walters, W.A., Widmann, J.,  
312 Yatsunencko, T., Zaneveld, J., Knight, R., 2010. QIIME allows analysis of high-throughput community sequencing data.  
313 *Nat Methods* 7, 335-336.
- 314 Chaudhary, D., Saxena, J., Lorenz, N., Dick, L., Dick, R., 2012. Microbial Profiles of Rhizosphere and Bulk Soil  
315 Microbial Communities of Biofuel Crops Switchgrass (*Panicum virgatum* L.) and *Jatropha* (*Jatropha curcas* L.). *Applied*  
316 *and Environmental Soil Science* 2012, 1-6.
- 317 Clarke, K.R., 1993. Non-parametric multivariate analyses of changes in community structure. *Australian Journal of*  
318 *Ecology* 18, 117-143.
- 319 Clemente, J.C., Ursell, L.K., Parfrey, L.W., Knight, R., 2012. The impact of the gut microbiota on human health: an  
320 integrative view. *Cell* 148, 1258-1270.
- 321 DeAngelis, K.M., Gladden, J.M., Allgaier, M., D'haeseleer, P., Fortney, J.L., Reddy, A., Hugenholtz, P., Singer, S.W.,  
322 Gheynst, J.S.V., Silver, W.L., Simmons, B.A., Hazen, T.C., 2010. Strategies for Enhancing the Effectiveness of  
323 Metagenomic-based Enzyme Discovery in Lignocellulolytic Microbial Communities. *BioEnergy Research* 3, 146-158.
- 324 Degefu, T., Wolde-Meskel, E., Liu, B., Cleenwerck, I., Willems, A., Frostegard, A., 2013. *Mesorhizobium shonense* sp.  
325 nov., *Mesorhizobium hawassense* sp. nov. and *Mesorhizobium abyssinicae* sp. nov., isolated from root nodules of  
326 different agroforestry legume trees. *Int J Syst Evol Microbiol* 63, 1746-1753.
- 327 DeSantis, T.Z., Hugenholtz, P., Larsen, N., Rojas, M., Brodie, E.L., Keller, K., Huber, T., Dalevi, D., Hu, P., Andersen,  
328 G.L., 2006. Greengenes, a chimera-checked 16S rRNA gene database and workbench compatible with ARB. *Appl*  
329 *Environ Microbiol* 72, 5069-5072.
- 330 Dufrene, M., Legendre, P., 1997. Species Assemblages and Indicator Species: The Need for a Flexible Asymmetrical  
331 Approach. *Ecological Monographs* 67, 345-366.
- 332 Edgar, R.C., 2010. Search and clustering orders of magnitude faster than BLAST. *Bioinformatics* 26, 2460-2461.

**Host associated core microbiome**

- 333 Evans, J.D., Schwarz, R.S., 2011. Bees brought to their knees: microbes affecting honey bee health. Trends in  
334 microbiology 19, 614-620.
- 335 Glick, B.R., 2014. Bacteria with ACC deaminase can promote plant growth and help to feed the world. Microbiol Res  
336 169, 30-39.
- 337 Gower, J.C., 2005. Principal Coordinates Analysis, Encyclopedia of Biostatistics, 2 ed. John Wiley and Sons, Ltd, The  
338 Open University, Milton Keynes, UK.
- 339 Guerrouj, K., Perez-Valera, E., Chahboune, R., Abdelmoumen, H., Bedmar, E.J., El Idrissi, M.M., 2013. Identification of  
340 the rhizobial symbiont of Astragalus glombiformis in Eastern Morocco as Mesorhizobium camelthorni. Antonie Van  
341 Leeuwenhoek 104, 187-198.
- 342 Hargreaves, S.K., Williams, R.J., Hofmockel, K.S., 2015. Environmental Filtering of Microbial Communities in  
343 Agricultural Soil Shifts with Crop Growth. PLoS ONE 10, e0134345.
- 344 Hayat, R., Ali, S., Amara, U., Khalid, R., Ahmed, I., 2010. Soil beneficial bacteria and their role in plant growth  
345 promotion: a review. Annals of Microbiology 60, 579-598.
- 346 Islam, M.T., Hashidoko, Y., Deora, A., Ito, T., Tahara, S., 2005. Suppression of damping-off disease in host plants by the  
347 rhizoplane bacterium Lysobacter sp. strain SB-K88 is linked to plant colonization and antibiosis against soilborne  
348 Peronosporomycetes. Appl Environ Microbiol 71, 3786-3796.
- 349 Jesus, Susilawati, E., Smith, S., Wang, Q., Chai, B., Farris, R., Rodrigues, J., Thelen, K., Tiedje, J., 2010. Bacterial  
350 Communities in the Rhizosphere of Biofuel Crops Grown on Marginal Lands as Evaluated by 16S rRNA Gene  
351 Pyrosequences. BioEnergy Research 3, 20-27.
- 352 Jesus, E.d.C., Liang, C., Quensen, J.F., Susilawati, E., Jackson, R.D., Balsler, T.C., Tiedje, J.M., 2016. Influence of corn,  
353 switchgrass, and prairie cropping systems on soil microbial communities in the upper Midwest of the United States. GCB  
354 Bioenergy 8, 481-494.
- 355 Ji, G.-H., Wei, L.-F., He, Y.-Q., Wu, Y.-P., Bai, X.-H., 2008. Biological control of rice bacterial blight by Lysobacter  
356 antibioticus strain 13-1. Biological Control 45, 288-296.
- 357 Jochum, C.C., Osborne, L.E., Yuen, G.Y., 2006. Fusarium head blight biological control with Lysobacter enzymogenes  
358 strain C3. Biological Control 39, 336-344.
- 359 Kaneko, T., Nakamura, Y., Sato, S., Asamizu, E., Kato, T., Sasamoto, S., Watanabe, A., Idesawa, K., Ishikawa, A.,  
360 Kawashima, K., Kimura, T., Kishida, Y., Kiyokawa, C., Kohara, M., Matsumoto, M., Matsuno, A., Mochizuki, Y.,

**R. Rodrigues et al.**

---

- 361 Nakayama, S., Nakazaki, N., Shimpo, S., Sugimoto, M., Takeuchi, C., Yamada, M., Tabata, S., 2000. Complete genome  
362 structure of the nitrogen-fixing symbiotic bacterium *Mesorhizobium loti*. *DNA Res.* 7, 331-338.
- 363 Kennedy, N., Brodie, E., Connolly, J., Clipson, N., 2004. Impact of lime, nitrogen and plant species on bacterial  
364 community structure in grassland microcosms. *Environ Microbiol* 6, 1070-1080.
- 365 Kilic-Ekici, O., Yuen, G.Y., 2004. Comparison of strains of *Lysobacter enzymogenes* and PGPR for induction of  
366 resistance against *Bipolaris sorokiniana* in tall fescue. *Biological Control* 30, 446-455.
- 367 Kuske, C.R., Ticknor, L.O., Miller, M.E., Dunbar, J.M., Davis, J.A., Barns, S.M., Belnap, J., 2002. Comparison of soil  
368 bacterial communities in rhizospheres of three plant species and the interspaces in an arid grassland. *Appl Environ*  
369 *Microbiol* 68, 1854-1863.
- 370 Lennon, J.T., Aanderud, Z.T., Lehmkuhl, B.K., Schoolmaster, D.R., 2012. Mapping the niche space of soil  
371 microorganisms using taxonomy and traits. *Ecology* 93, 1867-1879.
- 372 Liang, C., Jesus, E., Duncan, D., Jackson, R., Tiedje, J., Balsler, T., 2012. Soil microbial communities under model  
373 biofuel cropping systems in southern Wisconsin, USA: Impact of crop species and soil properties. *Applied Soil Ecology*  
374 54, 24-31.
- 375 Madhaiyan, M., Poonguzhali, S., Senthilkumar, M., Pragatheswari, D., Lee, J.S., Lee, K.C., 2015. *Arachidicoccus*  
376 *rhizosphaerae* gen. nov., sp. nov., a plant-growth-promoting bacterium in the family Chitinophagaceae isolated from  
377 rhizosphere soil. *Int J Syst Evol Microbiol* 65, 578-586.
- 378 Mao, Y., Li, X., Smyth, E., Yannarell, A., Mackie, R., 2014. Enrichment of specific bacterial and eukaryotic microbes in  
379 the rhizosphere of switchgrass (*Panicum virgatum* L.) through root exudates. *Environmental Microbiology Reports* 6, 13.
- 380 Mao, Y., Yannarell, A., Davis, S., Mackie, R., 2013. Impact of different bioenergy crops on N-cycling bacterial and  
381 archaeal communities in soil. *Environmental Microbiology* 15, 928-942.
- 382 Mao, Y., Yannarell, A., Mackie, R., 2011. Changes in N-Transforming Archaea and Bacteria in Soil during the  
383 Establishment of Bioenergy Crops. *PLoS ONE* 6, e24750.
- 384 Martin, M., 2011. Cutadapt removes adapter sequences from high-throughput sequencing reads. *EMBnet.journal* 17, 10.
- 385 McDonald, D., Price, M.N., Goodrich, J., Nawrocki, E.P., DeSantis, T.Z., Probst, A., Andersen, G.L., Knight, R.,  
386 Hugenholtz, P., 2012. An improved Greengenes taxonomy with explicit ranks for ecological and evolutionary analyses of  
387 bacteria and archaea. *ISME J* 6, 610-618.
- 388 Mielke, P.W., 1984. Meteorological applications of permutation techniques based on distance functions., In: Krishnaiah,  
389 P.R., Sen, P.K. (Eds.), *Handbook of statistics: Nonparametric methods*, Amsterdam: North-Holland, pp. 813-830.

**Host associated core microbiome**

- 390 Nandasena, K.G., O'Hara, G.W., Tiwari, R.P., Willems, A., Howieson, J.G., 2009. *Mesorhizobium australicum* sp. nov.  
391 and *Mesorhizobium opportunistum* sp. nov., isolated from *Biserrula pelecinus* L. in Australia. *Int J Syst Evol Microbiol*  
392 59, 2140-2147.
- 393 Park, J.H., Kim, R., Aslam, Z., Jeon, C.O., Chung, Y.R., 2008. *Lysobacter capsici* sp. nov., with antimicrobial activity,  
394 isolated from the rhizosphere of pepper, and emended description of the genus *Lysobacter*. *Int J Syst Evol Microbiol* 58,  
395 387-392.
- 396 Reichenbach, H., 2006. The Genus *Lysobacter*. 939-957.
- 397 Rodrigues, R.R., Moon, J., Zhao, B., Williams, M.A., 2016. Microbial communities and diazotrophic activity differ in the  
398 root-zone of Alamo and Dacotah switchgrass feedstocks. *GCB Bioenergy*.
- 399 Rodrigues, R.R., Pineda, R.P., Barney, J.N., Nilsen, E.T., Barrett, J.E., Williams, M.A., 2015. Plant Invasions Associated  
400 with Change in Root-Zone Microbial Community Structure and Diversity. *PLoS ONE* 10, e0141424.
- 401 Shade, A., Handelsman, J., 2012. Beyond the Venn diagram: the hunt for a core microbiome. *Environ Microbiol* 14, 4-  
402 12.
- 403 Souza, R., Ambrosini, A., Passaglia, L.M., 2015. Plant growth-promoting bacteria as inoculants in agricultural soils.  
404 *Genet Mol Biol* 38, 401-419.
- 405 Trabelsi, D., Mhamdi, R., 2013. Microbial inoculants and their impact on soil microbial communities: a review. *Biomed*  
406 *Res Int* 2013, 863240.
- 407 Turner, T., Ramakrishnan, K., Walshaw, J., Heavens, D., Alston, M., Swarbreck, D., Osbourn, A., Grant, A., Poole, P.,  
408 2013. Comparative metatranscriptomics reveals kingdom level changes in the rhizosphere microbiome of plants. *The*  
409 *ISME Journal* 7, 2248-2258.
- 410 Van de Poel, B., Van Der Straeten, D., 2014. 1-aminocyclopropane-1-carboxylic acid (ACC) in plants: more than just the  
411 precursor of ethylene! *Front Plant Sci* 5, 640.
- 412 Weir, B.S., Turner, S.J., Silvester, W.B., Park, D.C., Young, J.M., 2004. Unexpectedly diverse *Mesorhizobium* strains  
413 and *Rhizobium leguminosarum* nodulate native legume genera of New Zealand, while introduced legume weeds are  
414 nodulated by *Bradyrhizobium* species. *Appl Environ Microbiol* 70, 5980-5987.
- 415 Werling, B.P., Dickson, T.L., Isaacs, R., Gaines, H., Gratton, C., Gross, K.L., Liere, H., Malmstrom, C.M., Meehan,  
416 T.D., Ruan, L., Robertson, B.A., Robertson, G.P., Schmidt, T.M., Schrottenboer, A.C., Teal, T.K., Wilson, J.K., Landis,  
417 D.A., 2014. Perennial grasslands enhance biodiversity and multiple ecosystem services in bioenergy landscapes. *Proc*  
418 *Natl Acad Sci U S A* 111, 1652-1657.

*R. Rodrigues et al.*

---

419 Yin, H., 2010. Detection Methods for the Genus *Lysobacter* and the Species *Lysobacter enzymogenes*, Biological  
420 Sciences. University of Nebraska, Lincoln.

421 Zhao, Y., 2010. Auxin biosynthesis and its role in plant development. *Annu Rev Plant Biol* 61, 49-64.

422

423

424 **Figure 1: The COREMIC approach.** The workflow indicating the Jesus 2016 and Rodrigues 2016 datasets and differ-  
425 ences between them, and the methodology used to identify core microbiome. Switchgrass and other grasses are indicated  
426 by “Swg” and “Non-Swg,” respectively.

427

428 **Figure 2: Beta-diversity of the combined dataset.** PCoA plot showing Bray-Curtis dissimilarities for bacterial commu-  
429 nities at the OTU level in switchgrass (blue colored) and other grasses (red colored).

430

431 **Figure S1: Taxonomic summary of the relative abundance of bacterial phyla in the combined dataset.** The taxa and  
432 the labels are arranged as per total relative abundance across all samples, with the most abundant phyla at the bottom and  
433 the least abundant phyla at the top of the y-axis. Mann Whitney test was used to identify phyla with significantly different  
434 (p value < 0.05) relative abundance.

435

436 **Figure S2: Abundance of core microbiome of switchgrass.** The bar plot compares the relative abundance of  
437 switchgrass (red colored) core OTUs (90% threshold and  $q$ -value < 0.05) and non-switchgrass (yellow colored) samples.

438

439 **Figure S3: Core microbiome of switchgrass.** Phylogenetic tree showing relationships between core OTUs (90% thresh-  
440 old and  $q$ -value < 0.05) identified from switchgrass (blue colored) and non-switchgrass samples.

441

442

443 **Table S1: Processing times for COREMIC.**

---

| Rows =   | Cols =  | Trial 1 | Trial 2 | Trial 3 | Trial 4 | Trial 5 | Trial 6 | Mean   | Std. Er- |
|----------|---------|---------|---------|---------|---------|---------|---------|--------|----------|
| 678*numb | 59*numb |         |         |         |         |         |         |        | ror      |
| 1        | 1       | 13.102  | 12.017  | 12.015  | 12.314  | 11.924  | 11.603  | 12.163 | 0.210    |

---



**Host associated core microbiome**

|    |    |        |        |        |        |        |        |        |       |
|----|----|--------|--------|--------|--------|--------|--------|--------|-------|
| 2  | 1  | 28.426 | 26.511 | 27.832 | 28.623 | 25.742 | 30.245 | 27.896 | 0.655 |
| 10 | 1  | 37.913 | 84.115 | 41.965 | 70.986 | 43.540 | 46.456 | 54.163 | 7.671 |
| 1  | 2  | 12.924 | 13.924 | 12.914 | 14.639 | 16.016 | 17.961 | 14.730 | 0.802 |
| 1  | 10 | 30.127 | 41.331 | 24.405 | 32.020 | 34.582 | 48.253 | 35.120 | 3.467 |
| 2  | 2  | 29.118 | 29.512 | 29.586 | 34.621 | 36.447 | 35.057 | 32.390 | 1.359 |

---

444 The run times (in seconds) for different sized inputs with a 678 OTUs (rows) and 59 samples (columns) dataset using

445 default settings for COREMIC.

446

447

13 Swg, 28 Non-Swg  
771 OTUs

18 Swg  
1118 OTUs

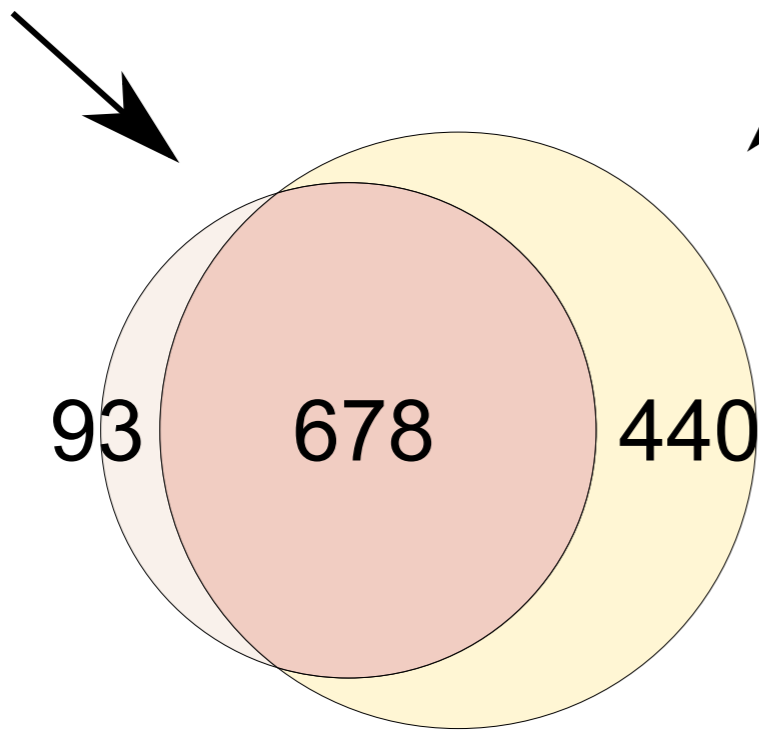

678 common OTUs | absolute/relative abundance

**Original data (treated as binary)**

|      | S-1 | S-2 | S-3 | S-n | N-1 | N-2 | N-3 | N-n |
|------|-----|-----|-----|-----|-----|-----|-----|-----|
| OTUx | 1   | 1   | 1   | 1   | 0   | 0   | 1   | 0   |
| OTUy | 1   | 1   | 1   | 1   | 0   | 0   | 1   | 1   |
| OTUz | 1   | 1   | 1   | 1   | 1   | 0   | 1   | 1   |
| OTUn | 0   | 0   | 1   | 0   | 1   | 1   | 1   | 0   |

**Fisher's exact test**

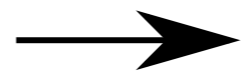

|                     | <b>Jesus 2016</b>                                | <b>Rodrigues 2016</b>  |
|---------------------|--------------------------------------------------|------------------------|
| Amplicon regions    | V6-V8                                            | V3-V4                  |
| Sequencing platform | Pyroseq                                          | Illumina               |
| Reads               | Single                                           | Paired                 |
| Lengths             | ~500 bp                                          | ~250 bp                |
| Location            | Wisconsin, Michigan                              | Virginia               |
| Age                 | 2 yrs, 10 yrs                                    | 1.5 months, 3.5 months |
| Site                | Field                                            | Greenhouse             |
| Plants              | Corn, Mixed grasses, Switchgrass, Praire grasses | Switchgrass            |

**Core microbiome**

OTUx    OTUy

OTU is significant if  $q$ -value < 5%

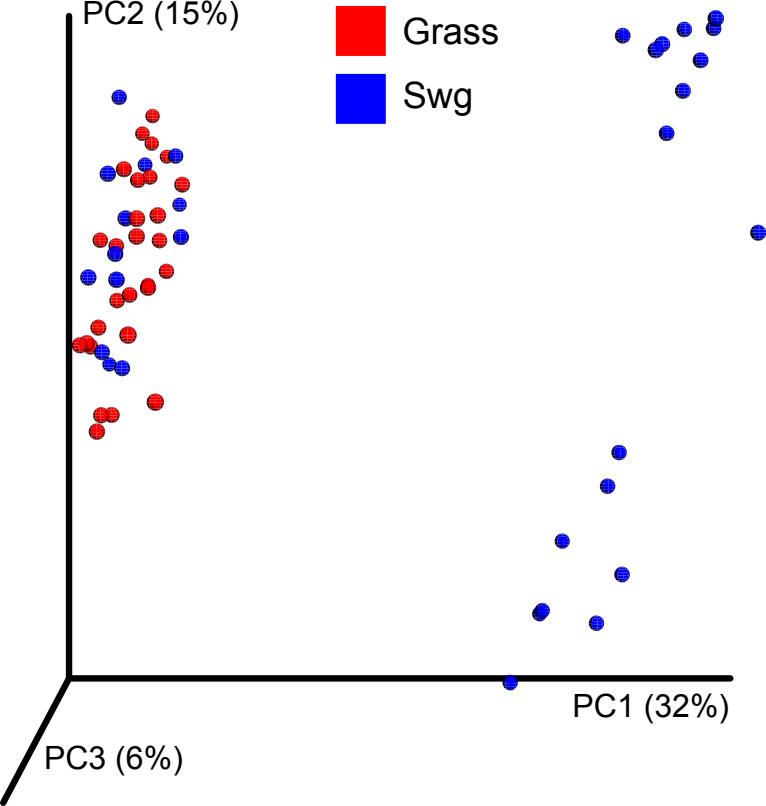

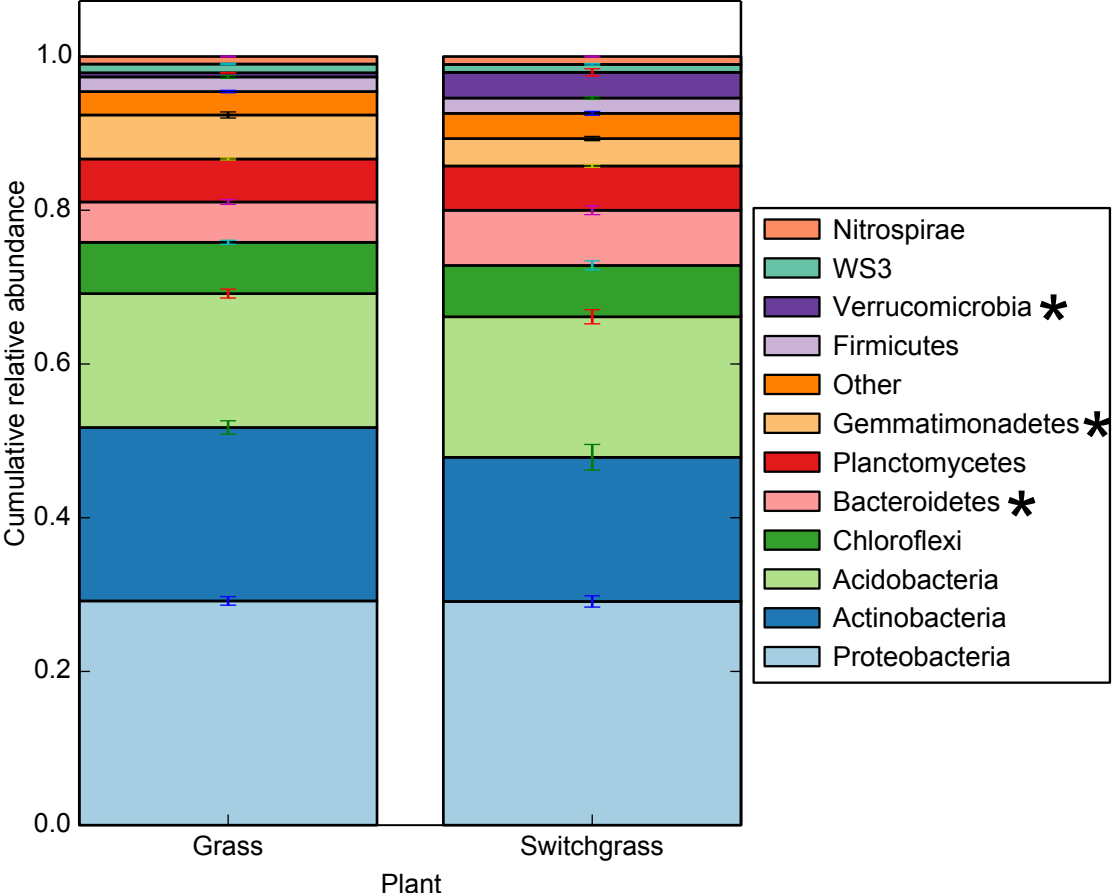

## Abundance of Core Microbes

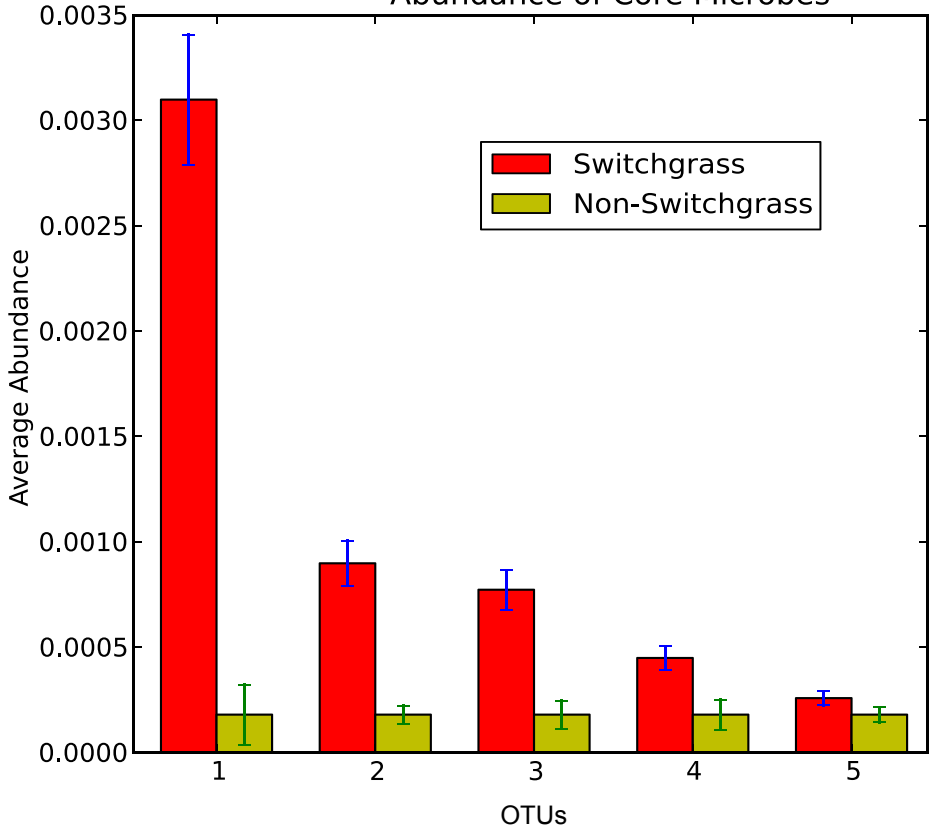

1: p\_Proteobacteria;c\_Gammaproteobacteria;o\_Xanthomonadales;f\_Xanthomonadaceae;g\_Lysobacter;s\_  
2: p\_Proteobacteria;c\_Alphaproteobacteria;o\_Rhizobiales;f\_Phyllobacteriaceae;g\_Mesorhizobium;s\_  
3: p\_Proteobacteria;c\_Gammaproteobacteria;o\_Legionellales;f\_g\_s\_  
4: p\_Bacteroidetes;c\_[Saprospirae];o\_[Saprospirales];f\_Chitinophagaceae  
5: p\_Planctomycetes;c\_Planctomycetia;o\_B97;f\_g\_s\_

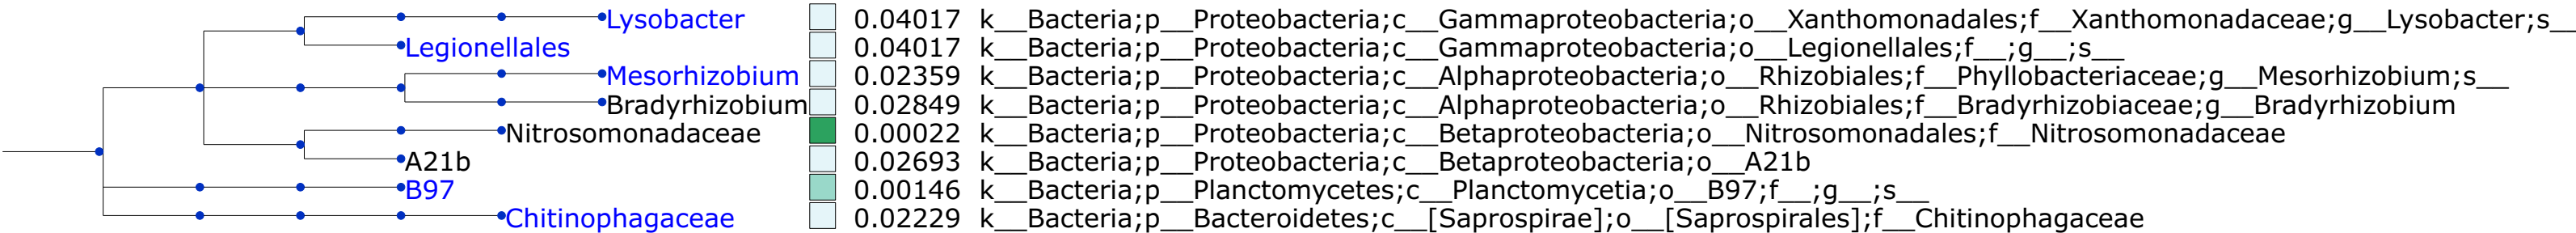

Source: https://www.biorxiv.org/content/10.1101/147009v1.full.pdf
